# Supplementary material
Source: PubMed Central journal article supplement (PMC7476127)
Supplement: ajtr0012-4739-f6.pdf [file ajtr0012-4739-f6.pdf]

## Nintedanib and tracheal stenosis

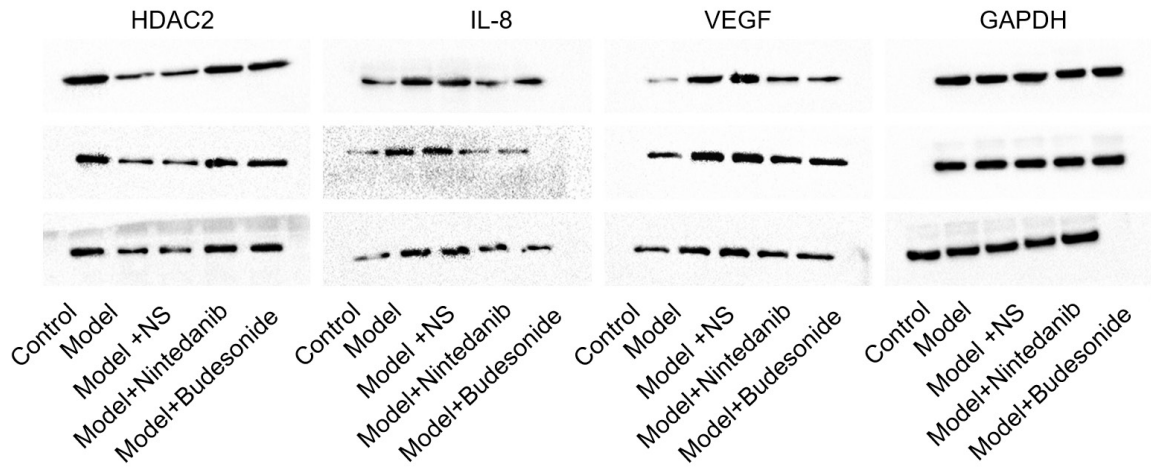

**Supplementary Figure 1.** Western blot analysis of HDAC2, IL-8 and VEGF proteins in tracheal tissues from rabbits after tracheal brushing and nintedanib treatments after using GAPDH as control. The blots were run independently three times and shown as three rows.
